# Supplementary material for: Biomass derived xylose Guerbet surfactants: thermotropic and lyotropic properties from small-angle X-ray scattering
Source: Royal Society of Chemistry journal article supplement (doi:10.1039/c5ra17828b), 2015-01-01

## Supporting Information

### **Biomass derived xylose Guerbet surfactants: thermotropic and lyotropic properties from small-angle X-ray scattering**

ChiaYen Liew, Malinda Salim, N. Idayu Zahid and Rauzah Hashim\*

Center of Fundamental Science of Self-Assembly, Department of Chemistry, Faculty of Science, University of Malaya, 50603, Kuala Lumpur, Malaysia.

\*E-mail: [rauzah@um.edu.my](mailto:rauzah@um.edu.my)

#### **Table of Contents**

|                                                                                                                        |   |
|------------------------------------------------------------------------------------------------------------------------|---|
| <sup>1</sup> H NMR and <sup>13</sup> C NMR data for the Guerbet xylosides .....                                        | 2 |
| FTIR spectra for $\beta$ -Xyl-C <sub>8</sub> C <sub>4</sub> in dry, ambient moisture and excess water (Figure S1)..... | 4 |
| DSC thermograms for the Guerbet xylosides (Figure S2) .....                                                            | 4 |
| X-ray scattering (SAXS) patterns for the dry Guerbet xylosides (Figure S3) .....                                       | 5 |
| <sup>1</sup> H NMR and <sup>13</sup> C NMR spectra for the Guerbet xylosides .....                                     | 6 |

## $^1\text{H}$ NMR and $^{13}\text{C}$ NMR for the synthetic Guerbet xylosides

### 2-ethyl-hexyl- $\beta$ -D-xylopyranoside, $\beta$ -Xyl-C<sub>6</sub>C<sub>2</sub>

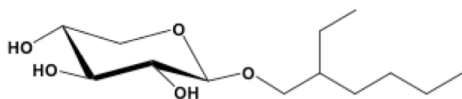

$^1\text{H}$  NMR (400 MHz, CD<sub>3</sub>OD):  $\delta$  (ppm) = 0.92 (t, 6H,  $J$  = 7.16 Hz, 2 x CH<sub>3</sub>), 1.25 -1.50 (m, 9H, CH<sub>2</sub> and CH), 3.22 (m, 2H, H-1'), 3.32 (m, 1H, H-3), 3.42 (m, 1H, H-2), 3.50 (m, 1H, H-4), 3.74 (m, 1H, H-5<sub>e</sub>), 3.87 (dd, 1H,  $J_{4,5a}$  = 5.28 Hz,  $J_{5a,5e}$  = 11.44 Hz, H-5<sub>a</sub>), 4.19 (d, 1H,  $J_{1,2}$  = 7.48 Hz, H-1).

$^{13}\text{C}$  NMR (400 MHz, CD<sub>3</sub>OD):  $\delta$  (ppm) = 103.97 (C-1), 76.52 (C-3), 73.53 (C-2), 72.43 (C-4), 69.86 (C-5), 38.04 (C- $\alpha$ ), 31.67, 29.64, 29.39, 29.30, 29.28, 29.07, 26.37, 26.30, 22.33 (C -CH<sub>2</sub>), 13.03 (CH<sub>3</sub>).

### 2-butyl-octyl- $\beta$ -D-xylopyranoside, $\beta$ -Xyl-C<sub>8</sub>C<sub>4</sub>

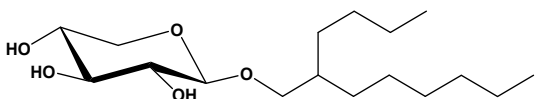

$^1\text{H}$  NMR (400 MHz, CD<sub>3</sub>OD):  $\delta$  (ppm) = 0.92 (t, 6H,  $J$  = 4.92 Hz, 2 x CH<sub>3</sub>), 1.25 -1.50 (m, 17H, CH<sub>2</sub> and CH), 3.20 (m, 2H, H-1'), 3.32 (m, 1H, H-3), 3.41 (m, 1H, H-2), 3.50 (m, 1H, H-4), 3.74 (dd, 1H,  $J_{4,5e}$  = 6.06 Hz,  $J_{5a,5e}$  = 9.34 Hz, H-5<sub>e</sub>), 3.87 (dd, 1H,  $J_{4,5a}$  = 5.30 Hz,  $J_{5a,5e}$  = 11.42 Hz, H-5<sub>a</sub>), 4.18 (d, 1H,  $J_{1,2}$  = 7.48 Hz, H-1).

$^{13}\text{C}$  NMR (400 MHz, CD<sub>3</sub>OD):  $\delta$  (ppm) = 103.95 (C-1), 76.48 (C-3), 73.51 (C-2), 72.36 (C-4), 69.85 (C-5), 38.12 (C- $\alpha$ ), 31.63, 30.87, 30.85, 29.42, 28.77, 28.72, 26.44, 26.37, 22.72, 22.33, 19.66 (C -CH<sub>2</sub>), 13.05 (CH<sub>3</sub>).

### 2-hexyl-decyl- $\beta$ -D-xylopyranoside, $\beta$ -Xyl-C<sub>10</sub>C<sub>6</sub>

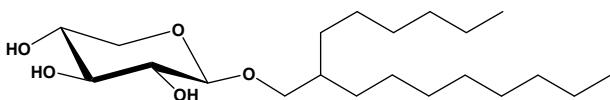

$^1\text{H}$  NMR (400 MHz, CD<sub>3</sub>OD):  $\delta$  (ppm) = 0.92 (t, 6H,  $J$  = 6.78 Hz, 2 x CH<sub>3</sub>), 1.26 (m, 25H, CH<sub>2</sub> and CH), 3.19 (m, 2H, H-1'), 3.31 (m, 1H, H-3), 3.41 (m, 1H, H-2), 3.50 (m, 1H, H-4), 3.73 (dd, 1H,  $J_{4,5e}$  = 6.06 Hz,  $J_{5a,5e}$  = 9.42 Hz, H-5<sub>e</sub>), 3.87 (dd, 1H,  $J_{4,5a}$  = 5.31 Hz,  $J_{5a,5e}$  = 11.42 Hz, H-5<sub>a</sub>), 4.18 (d, 1H,  $J_{1,2}$  = 7.52 Hz, H-1).

$^{13}\text{C}$  NMR (400 MHz, CD<sub>3</sub>OD):  $\delta$  (ppm) = 103.95 (C-1), 76.51 (C-3), 73.51 (C-2), 72.39 (C-4), 69.85 (C-5), 38.13 (C- $\alpha$ ), 31.70, 31.67, 30.89, 30.86, 29.76, 29.45, 29.34, 29.09, 26.47, 26.39, 22.53, 22.38, 22.37, 22.18 (C -CH<sub>2</sub>), 19.39, 13.03 (CH<sub>3</sub>).

### 2-octyl-dodecyl- $\beta$ -D-xylopyranoside, $\beta$ -Xyl-C<sub>12</sub>C<sub>8</sub>

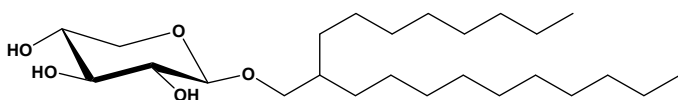

<sup>1</sup>H NMR (400 MHz, CD<sub>3</sub>OD):  $\delta$  (ppm) = 0.93 (t, 6H, J = 6.54 Hz, 2 x CH<sub>3</sub>), 1.32 (m, 33H, CH<sub>2</sub> and CH), 3.22 (m, 2H, H-1'), 3.32 (m, 1H, H-3), 3.41 (m, 1H, H-2), 3.52 (m, 1H, H-4), 3.74 (m, 1H, H-5<sub>e</sub>), 3.87 (dd, 1H, J<sub>4,5a</sub> = 7.04 Hz, J<sub>5a,5e</sub> = 10.92 Hz, H-5<sub>a</sub>), 4.19 (d, 1H, J<sub>1,2</sub> = 7.48 Hz, H-1).

<sup>13</sup>C NMR (400 MHz, CD<sub>3</sub>OD):  $\delta$  (ppm) = 103.94 (C-1), 76.50 (C-3), 73.48 (C-2), 72.41 (C-4), 69.84 (C-5), 38.14 (C- $\alpha$ ), 31.94, 31.77, 31.60, 30.89, 30.87, 30.70, 29.83, 29.49, 29.47, 29.45, 29.43, 29.20, 29.17, 26.54, 26.45, 22.60, 22.44, 22.26 (C -CH<sub>2</sub>), 14.16, 13.25 (CH<sub>3</sub>).

### 2-decyl-tetradecyl- $\beta$ -D-xylopyranoside, $\beta$ -Xyl-C<sub>14</sub>C<sub>10</sub>

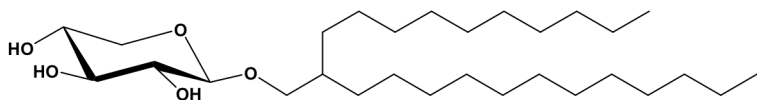

<sup>1</sup>H NMR (400 MHz, CD<sub>3</sub>OD):  $\delta$  (ppm) = 0.92 (t, 6H, J = 6.82 Hz, 2 x CH<sub>3</sub>), 1.32 (m, 41H, CH<sub>2</sub> and CH), 3.19 (m, 2H, H-1'), 3.32 (m, 1H, H-3), 3.41 (m, 1H, H-2), 3.50 (m, 1H, H-4), 3.73 (dd, 1H, J<sub>4,5e</sub> = 6.08 Hz, J<sub>5a,5e</sub> = 9.40 Hz, H-5<sub>e</sub>), 3.87 (dd, 1H, J<sub>4,5a</sub> = 5.30 Hz, J<sub>5a,5e</sub> = 11.42 Hz, H-5<sub>a</sub>), 4.18 (d, 1H, J<sub>1,2</sub> = 7.52 Hz, H-1).

<sup>13</sup>C NMR (400 MHz, CD<sub>3</sub>OD):  $\delta$  (ppm) = 103.97 (C-1), 76.51 (C-3), 73.52 (C-2), 72.43 (C-4), 69.85 (C-5), 38.06 (C- $\alpha$ ), 31.70, 30.78, 30.76, 29.68, 29.42, 29.38, 29.35, 29.33, 29.31, 29.10, 26.41, 26.33, 22.35 (C -CH<sub>2</sub>), 13.07 (CH<sub>3</sub>).

## FTIR for $\beta$ -Xyl- $C_8C_4$

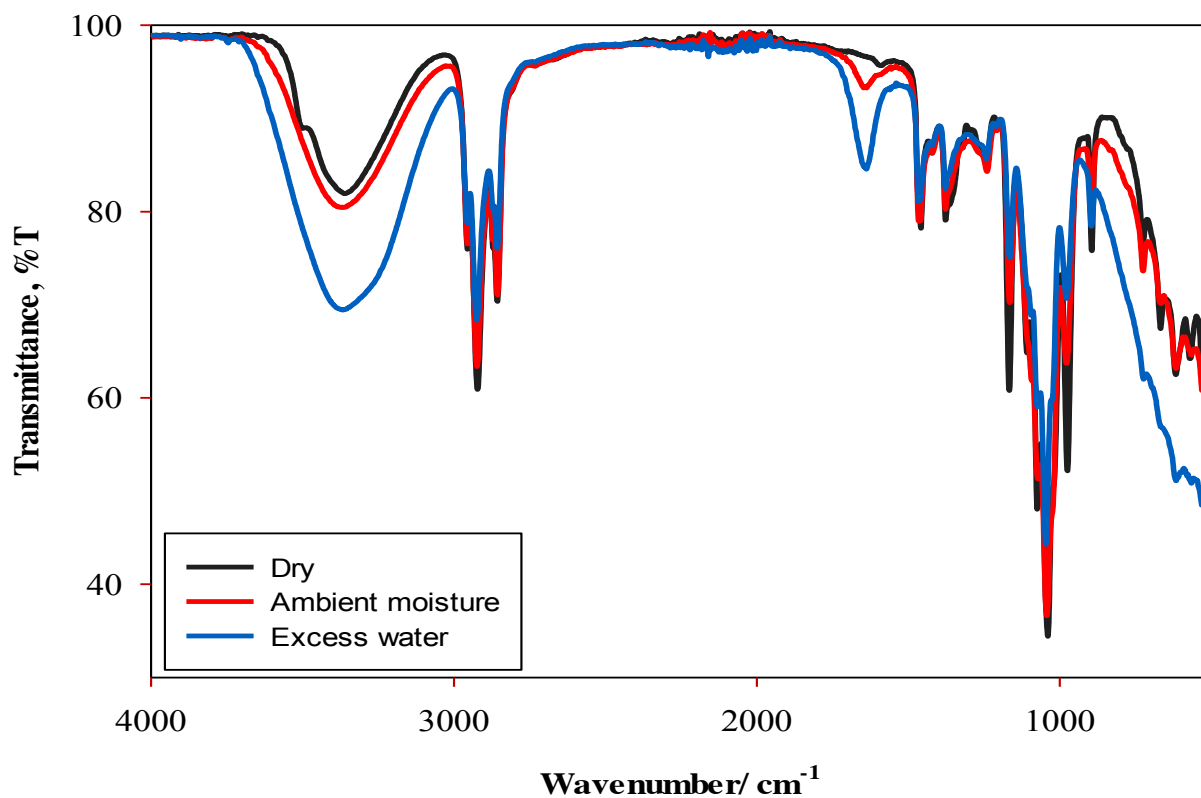

**Figure S1.** FTIR spectra for  $\beta$ -Xyl- $C_8C_4$  in dry (after lyophilised in freeze dryer for at least 48 hours), left in ambient moisture for 96 hours and in excess water form.

## Differential Scanning Calorimetry (DSC)

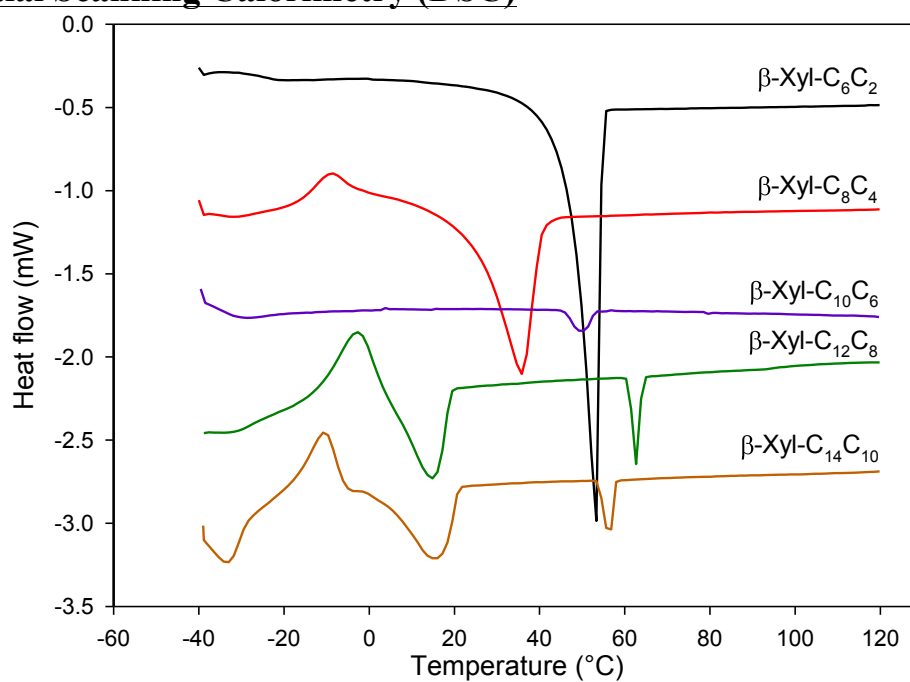

**Figure S2.** DSC thermograms for dry  $\beta$ -D-xylopyranosides.

## X-Ray Scattering Patterns

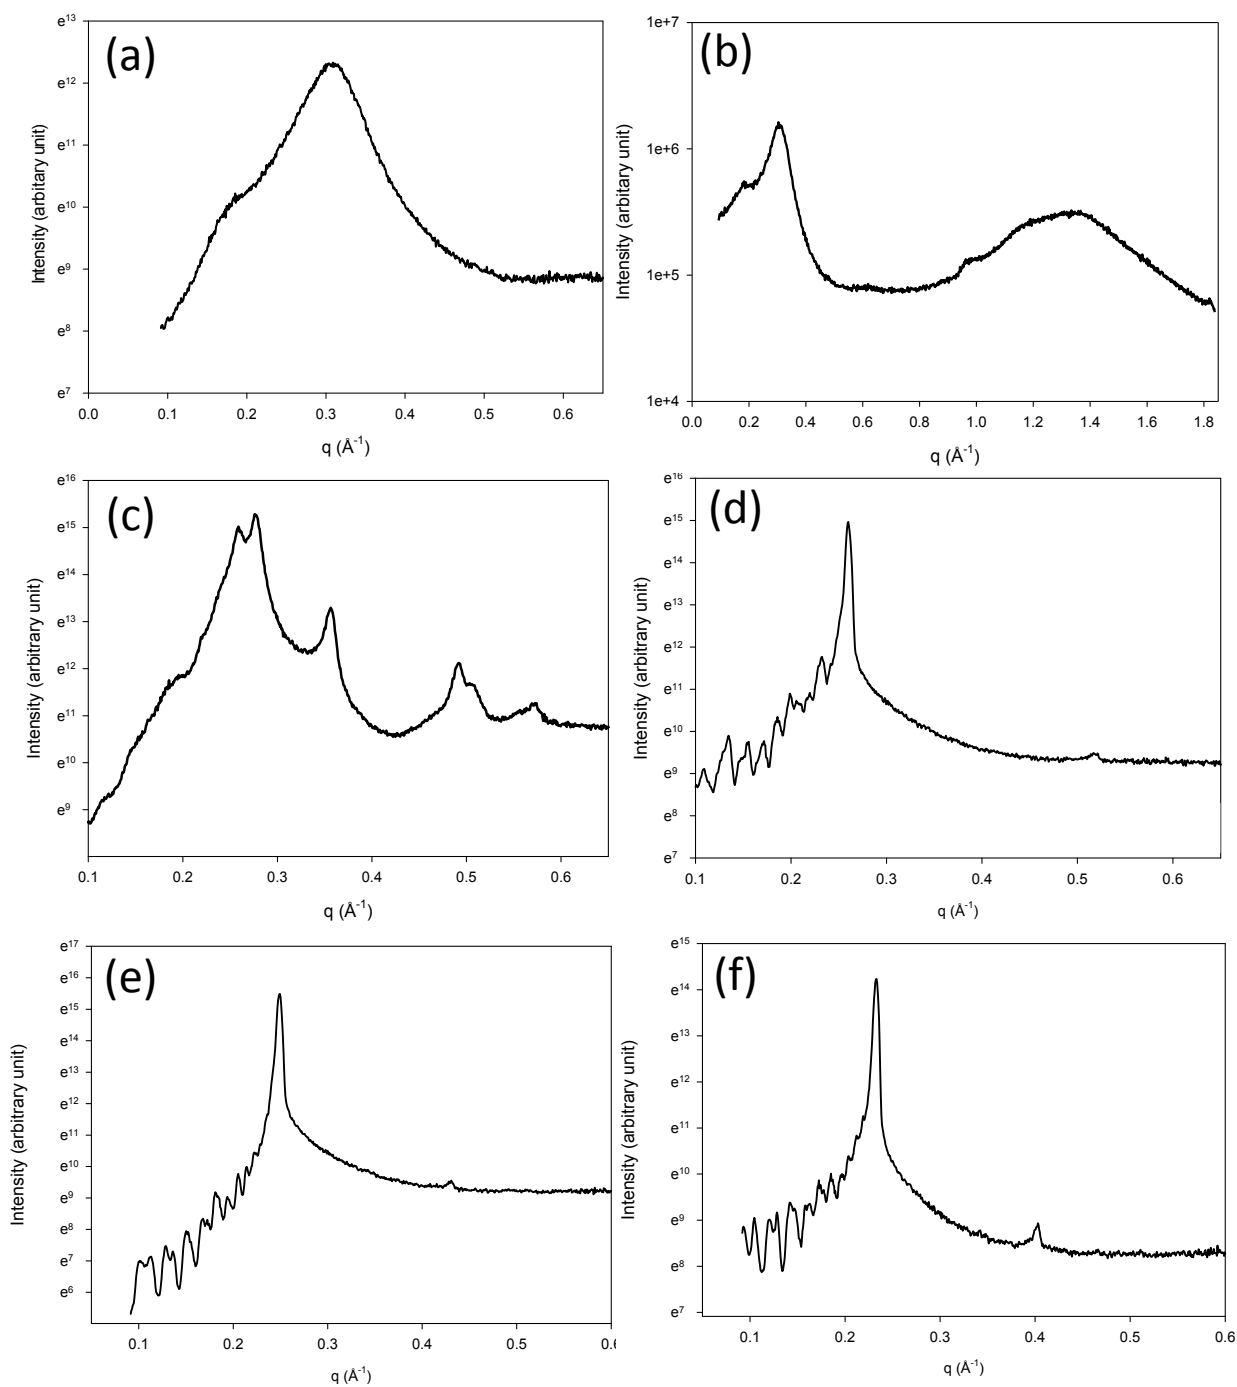

**Figure S3.** Scattering pattern in small angle X-ray for dry (a)  $\beta$ -Xyl- $C_6C_2$  at 25°C, (c)  $\beta$ -Xyl- $C_8C_4$  at 25°C, (d)  $\beta$ -Xyl- $C_{10}C_6$  at 25°C, (e)  $\beta$ -Xyl- $C_{12}C_8$  at 25°C, and (f)  $\beta$ -Xyl- $C_{14}C_{10}$  at 25°C. Scattering pattern in wide angle X-ray for (b) dry  $\beta$ -Xyl- $C_6C_2$  at 25°C.

1H-b-xyloside #1 Free

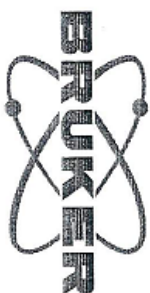

- 8.387
- 4.879
- 4.193
- 4.174
- 3.887
- 3.874
- 3.859
- 3.846
- 3.760
- 3.750
- 3.745
- 3.737
- 3.721
- 3.505
- 3.492
- 3.481
- 3.468
- 3.443
- 3.428
- 3.420
- 3.410
- 3.405
- 3.388
- 3.368
- 3.329
- 3.320
- 3.296
- 3.228
- 3.202
- 3.183
- 3.175
- 3.162
- 2.003
- 1.556
- 1.543
- 1.469
- 1.460
- 1.451
- 1.444
- 1.434
- 1.425
- 1.404
- 1.386
- 1.323
- 0.947
- 0.931
- 0.912
- 0.893

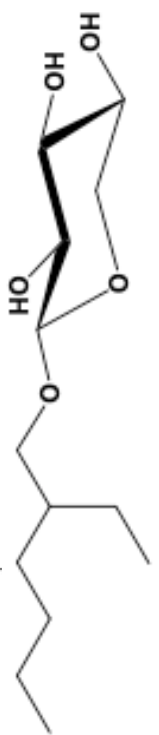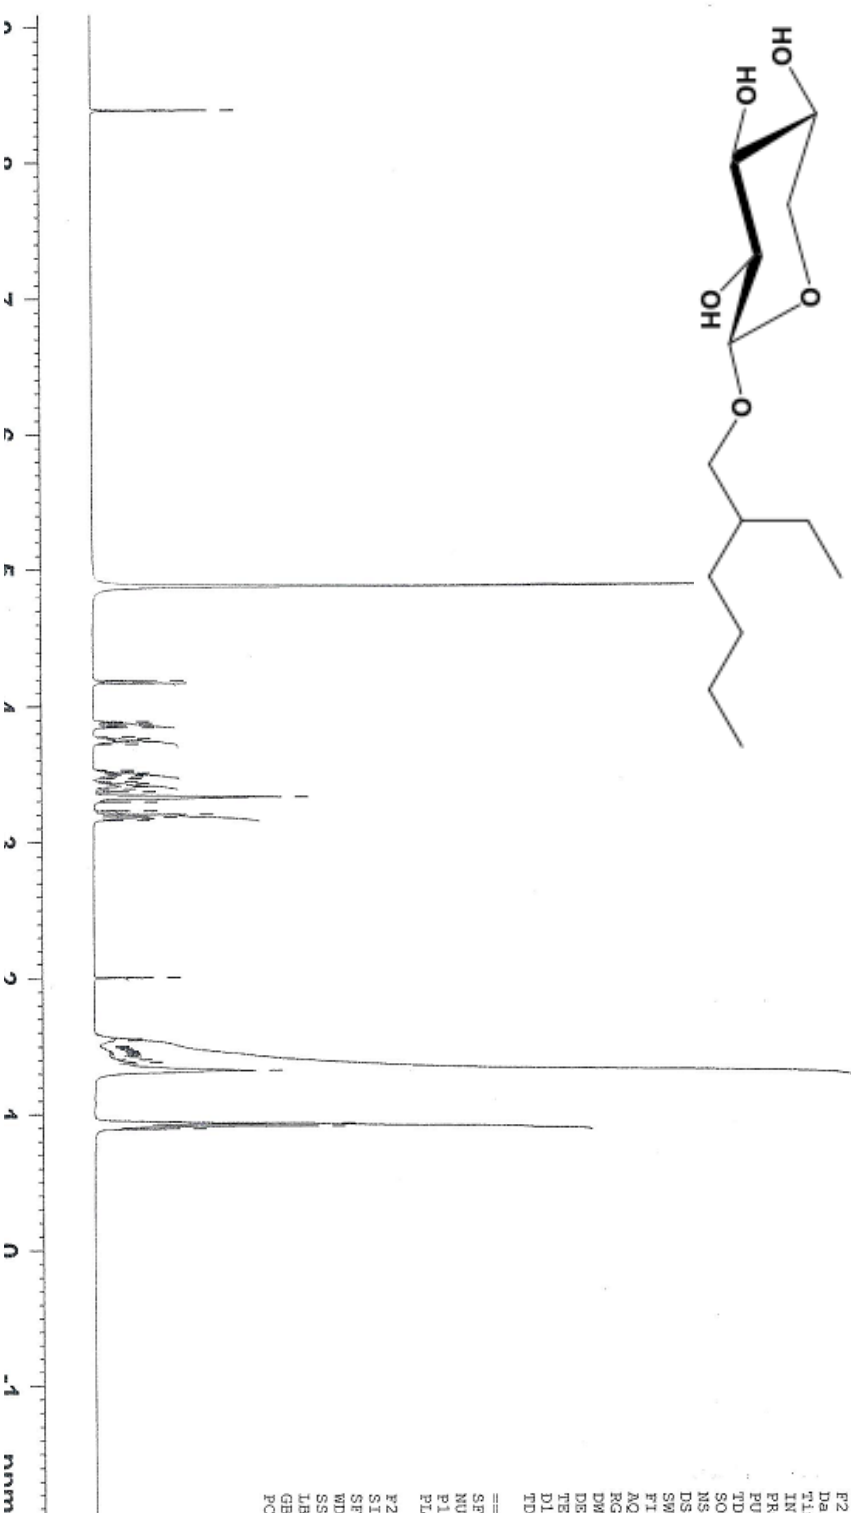

Current Data Parameters  
 NAME Jul07-2014 b-xy1-#1 free  
 EXPNO 10  
 PROCNO 1

F2 - Acquisition Parameters  
 Date\_ 20140707  
 Time 12.42  
 INSTRUM spect  
 PROBHD 5 mm PABBO BB/  
 PULPROG zg30  
 TD 65536  
 FIDRES 0.122266 Hz  
 AQ 4.0894966 sec  
 RG 138.31  
 DW 62.400 usec  
 DE 6.50 usec  
 TE 298.1 K  
 D1 1.00000000 sec  
 TDO 1

CHANNEL f1  
 SFO1 400.1324710 MHz  
 NUCL1 1H  
 P1 15.50 usec  
 PLW1 12.00000000 w  
 F2 - Processing parameters  
 SI 65536  
 SF 400.1300000 MHz  
 WDW EM  
 SSB 0  
 LB 0.30 Hz  
 GB 0  
 PC 1.00

13C- b xyloside #1

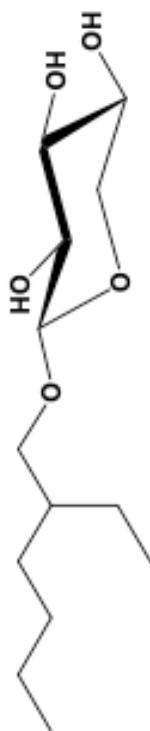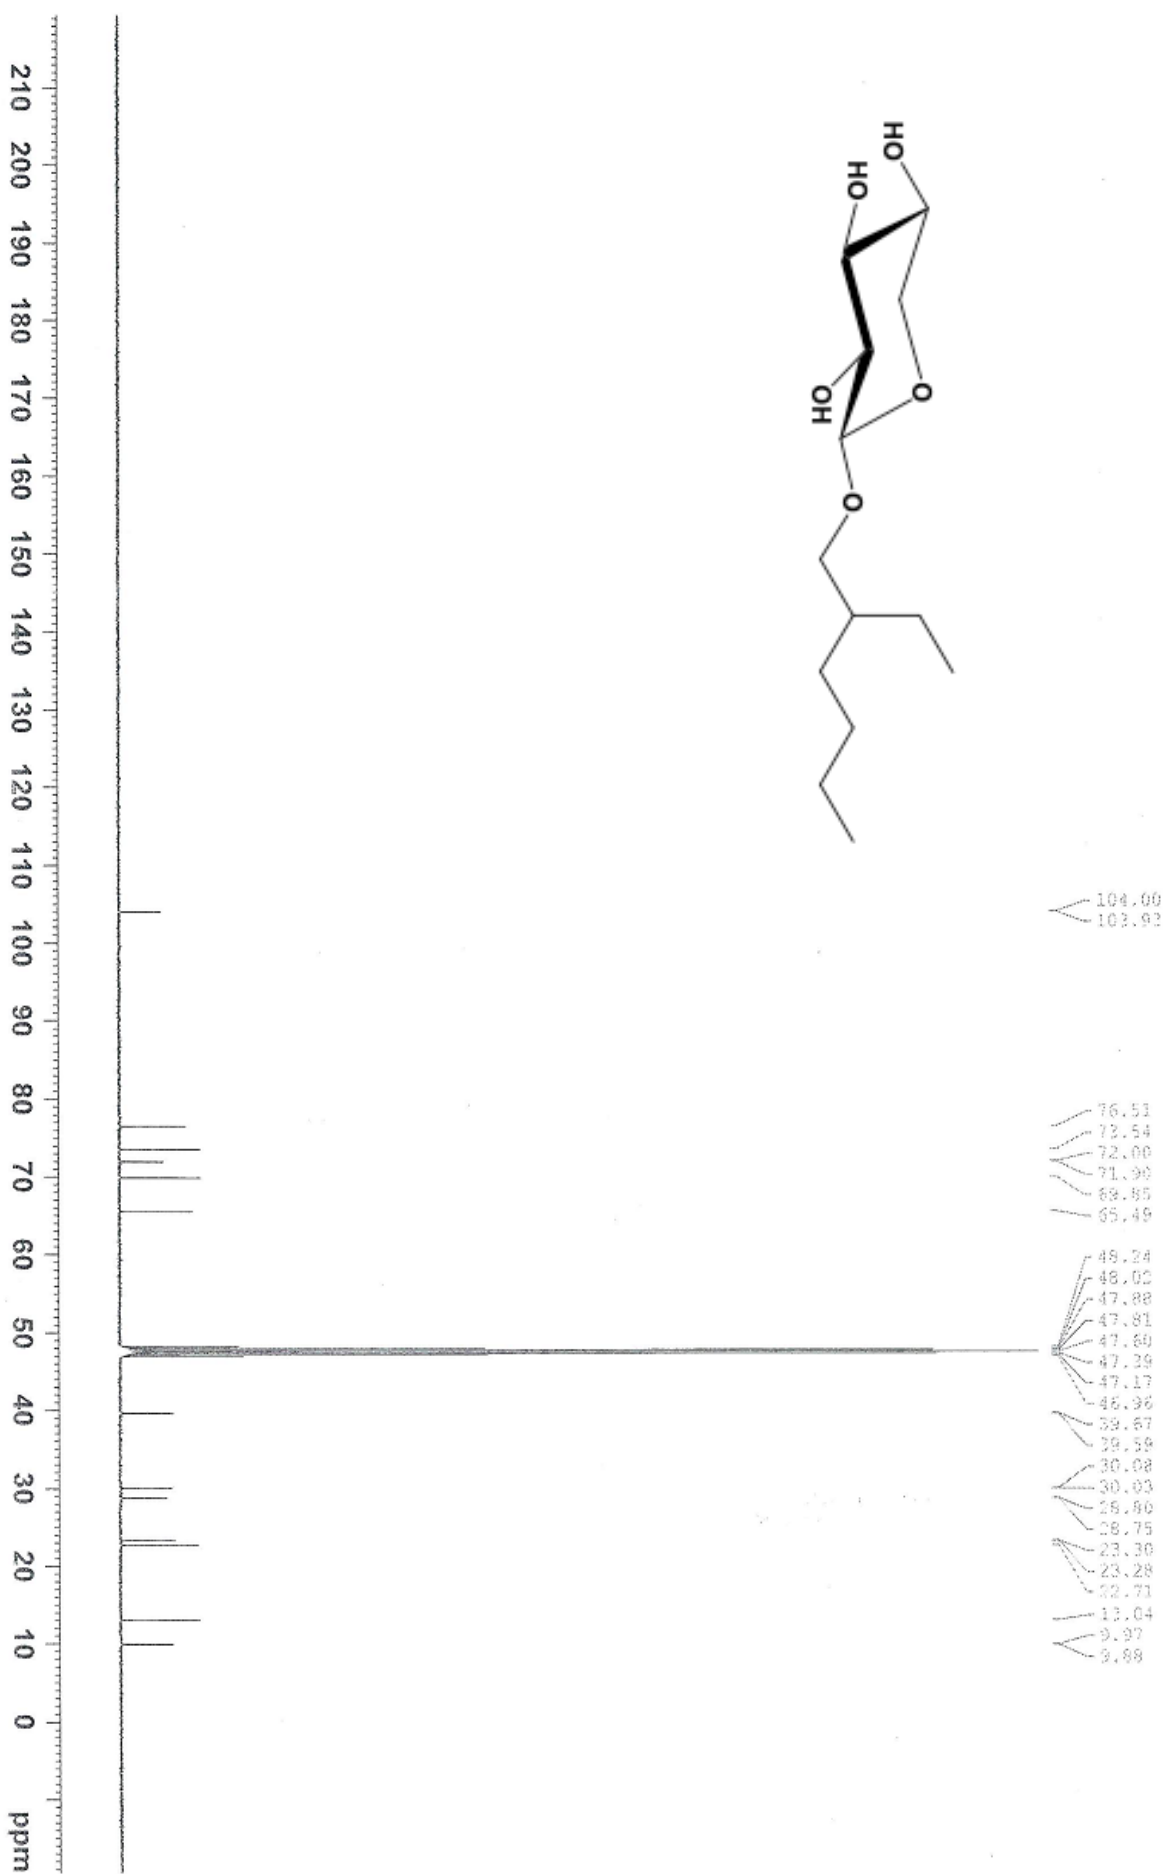

1H- b xyloside #2

- 4.865
- 4.587
- 4.190
- 4.171
- 3.887
- 3.874
- 3.858
- 3.845
- 3.755
- 3.740
- 3.732
- 3.717
- 3.529
- 3.515
- 3.505
- 3.492
- 3.482
- 3.468
- 3.429
- 3.415
- 3.406
- 3.391
- 3.329
- 3.317
- 3.294
- 3.226
- 3.200
- 3.185
- 3.172
- 3.164
- 2.176
- 1.625
- 1.613
- 1.601
- 1.418
- 1.402
- 1.316
- 0.931

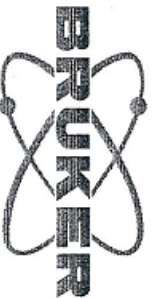

Current Data Parameters  
 NAME Jul10-2014 b xyl #2  
 EXPNO 10  
 PROCNO 1

F2 - Acquisition Parameters  
 Date\_ 20140710  
 Time\_ 12.30  
 INSTRUM spect  
 PROBDM 5 mm PABBO BB/  
 PULPROG zg30  
 TD 65536  
 SOLVENT MeOD  
 NS 128  
 DS 2  
 SWH 8012.820 Hz  
 FIDRES 0.122266 Hz  
 AQ 4.0894966 sec  
 RG 107.78  
 DM 62.400 usec  
 DE 6.50 usec  
 TE 298.1 K  
 D1 1.00000000 sec  
 TD0 1

==== CHANNEL f1 =====  
 SFO1 400.1324710 MHz  
 NUC1 1H  
 P1 15.50 usec  
 PLW1 12.00000000 W  
 F2 - Processing parameters  
 SI 65536  
 SF 400.1300000 MHz  
 WDM EM  
 SSB 0  
 LB 0.30 Hz  
 GB 0  
 PC 1.00

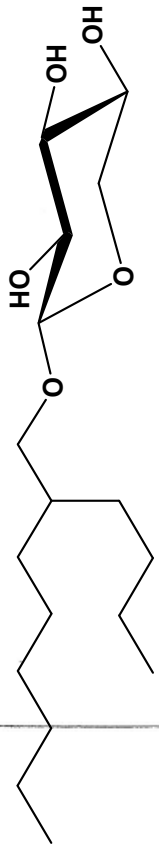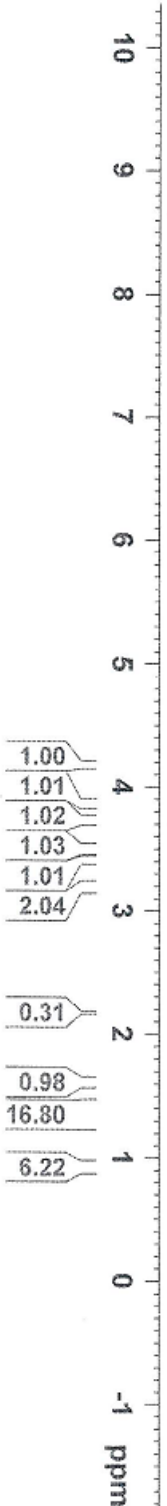



1H- b xyloside #2

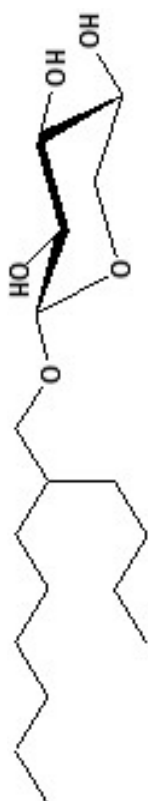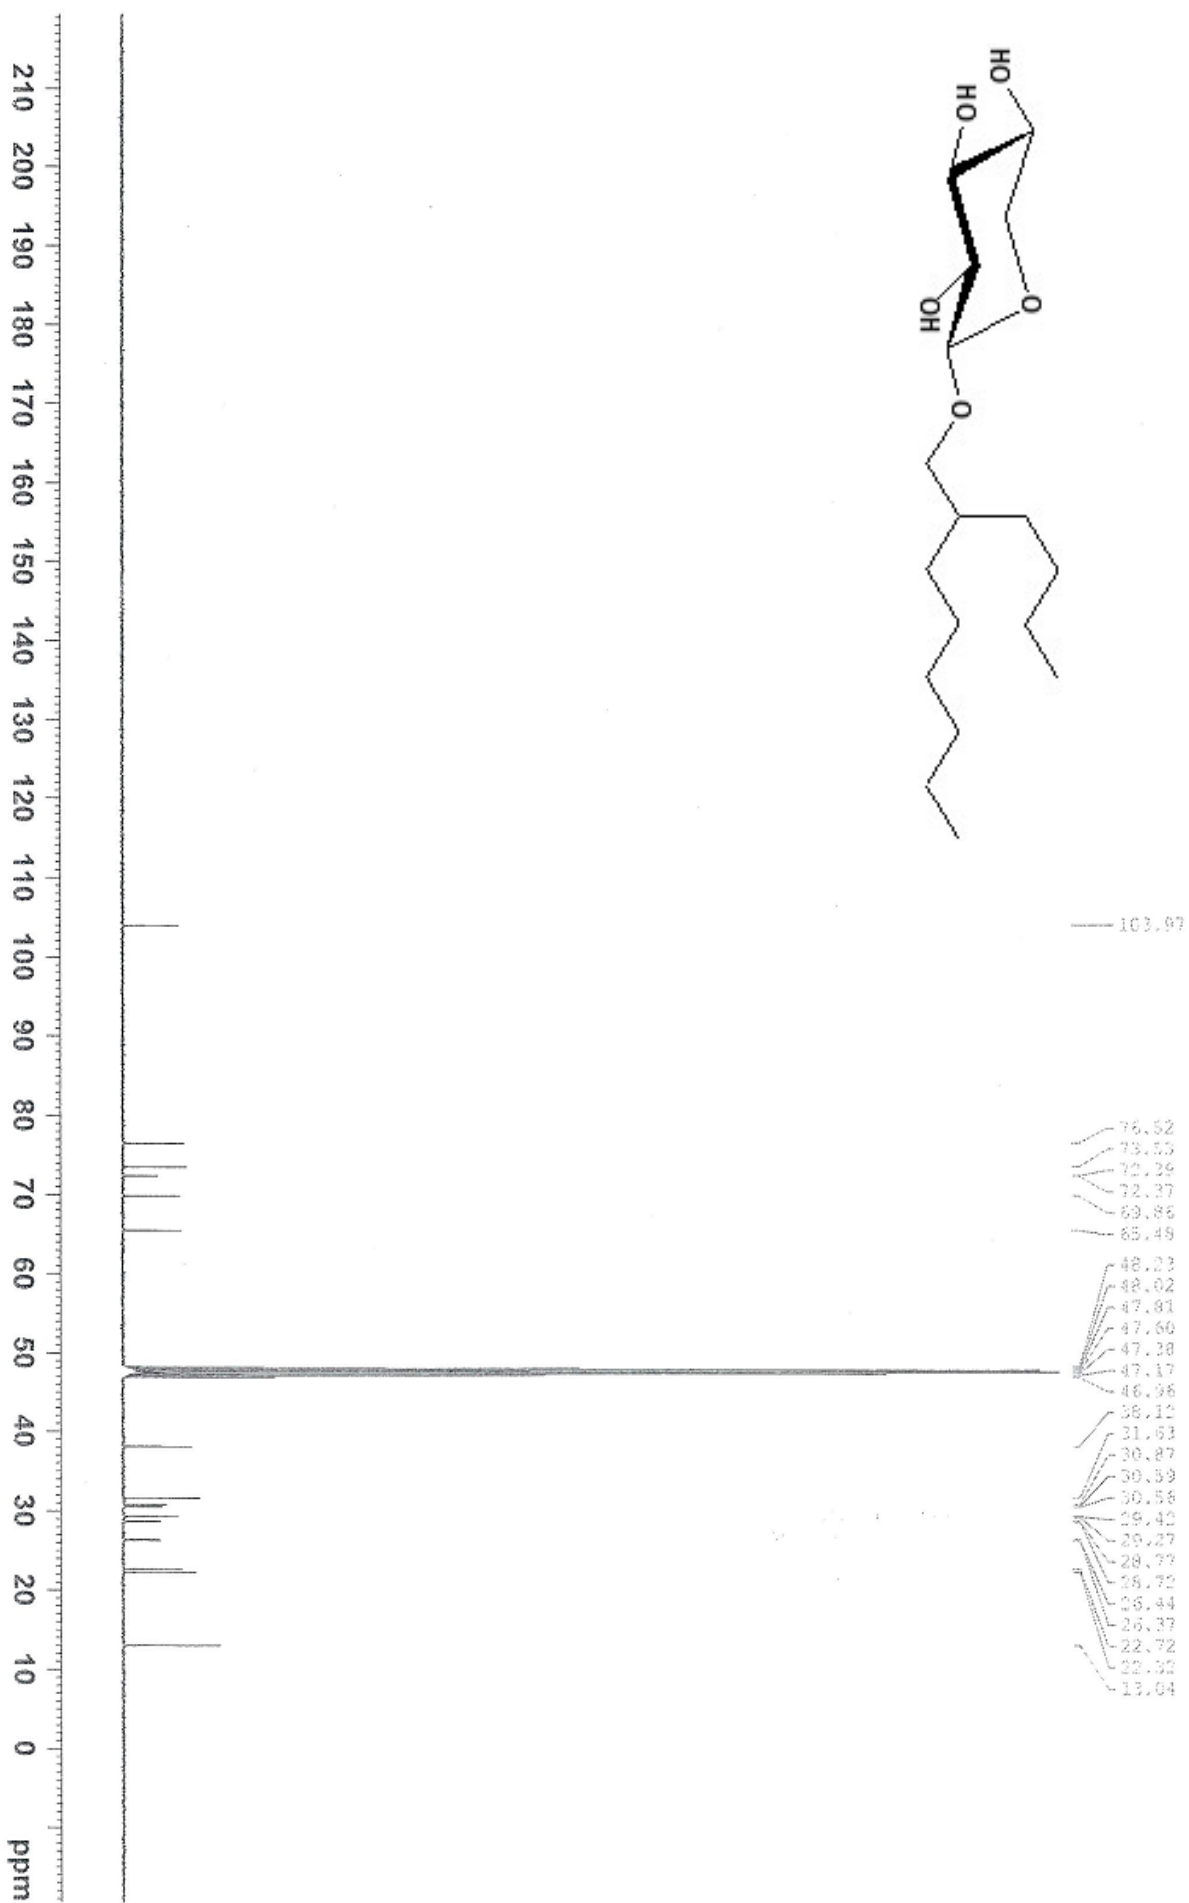

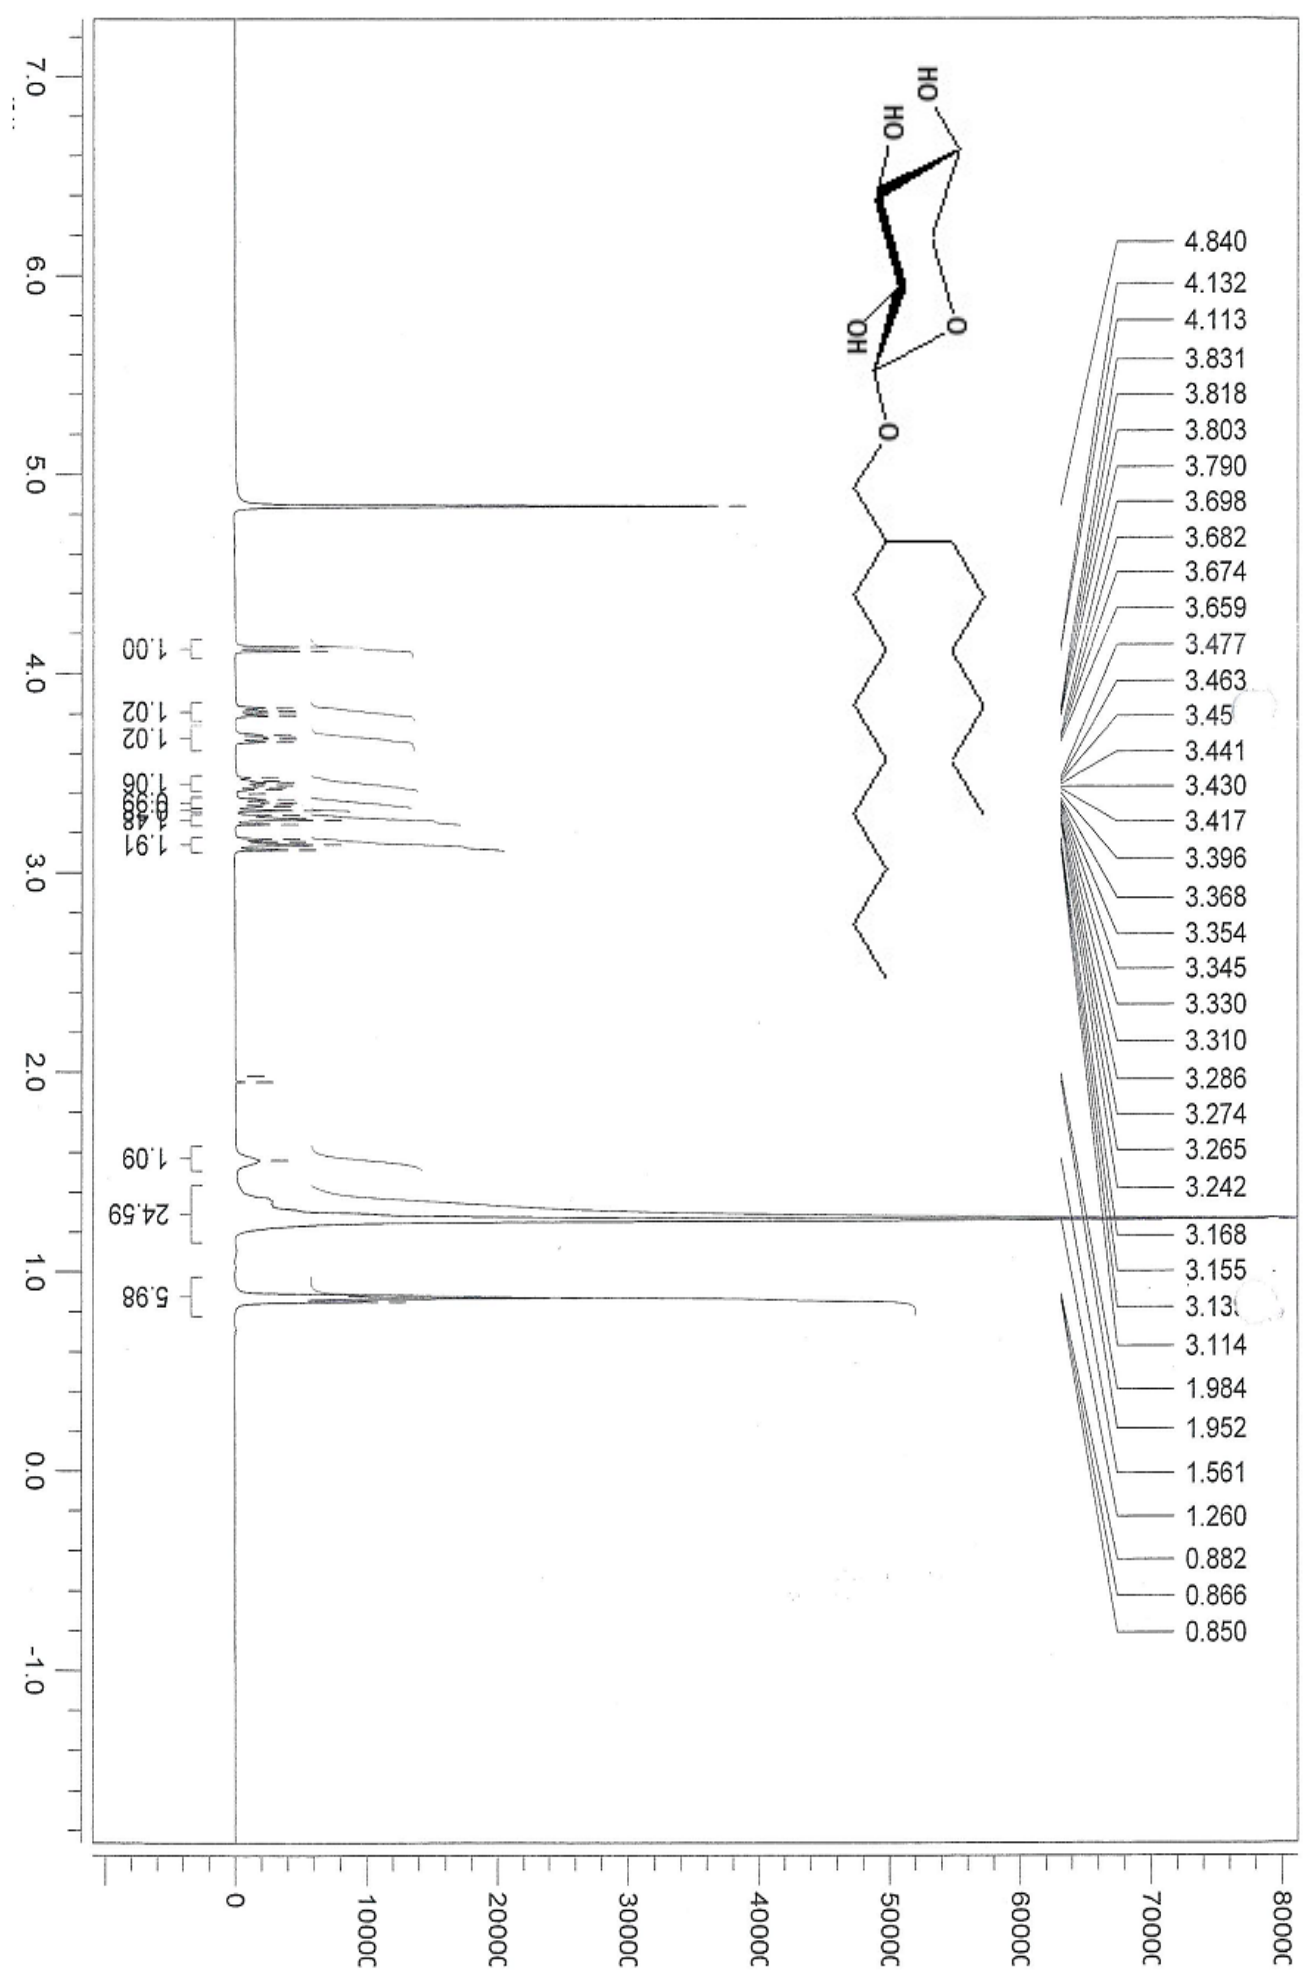

13C-xylose #3 deAc

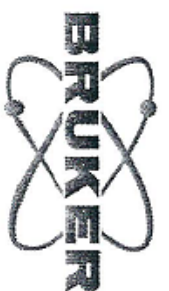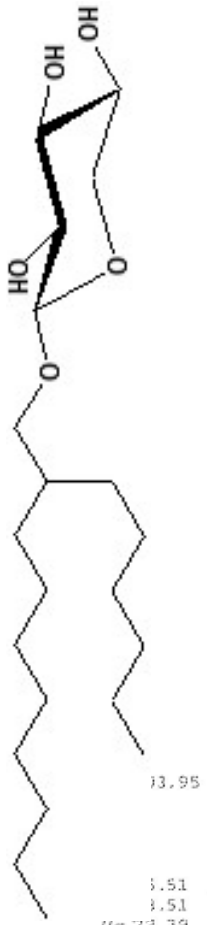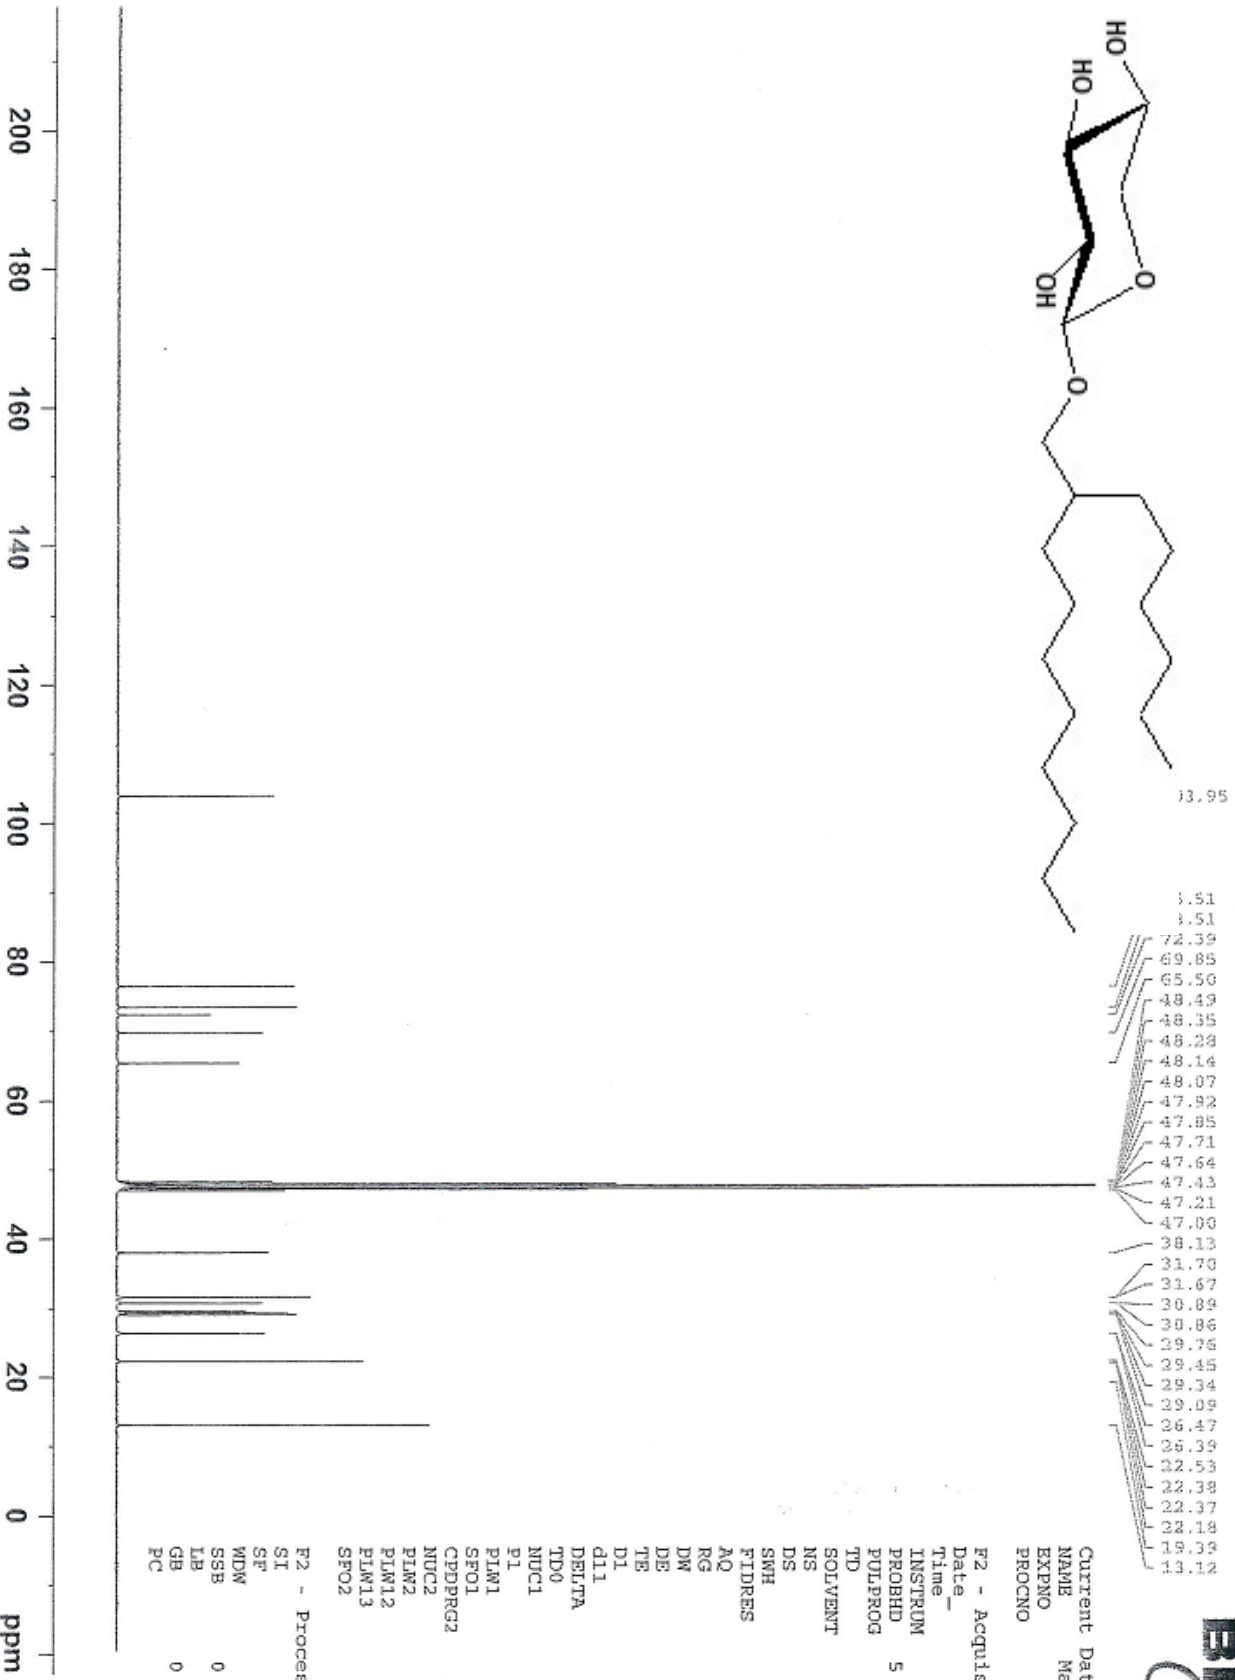

Current Data Parameters  
 NAME Mar24-2014 L1ew  
 EXPNO 22  
 PROCNO 1

F2 - Acquisition Parameters  
 Date\_ 20140324  
 Time 14.10  
 INSTRUM spect  
 PROBHD 5 mm PABBO BB/  
 PULPROG zgpg30  
 TD 65536  
 SOLVENT MeOD  
 NS 800  
 DS 4

SWH 24038.461 Hz  
 FIDRES 0.366798 Hz  
 AQ 1.3631988 sec  
 RG 200.65  
 DW 20.800 usec  
 DE 6.50 usec  
 TE 297.3 K  
 D1 2.0000000 sec  
 d11 0.0300000 sec  
 DELTA 1.89999998 sec  
 TD0 1  
 MUC1 13C  
 P1 10.00 usec  
 PLM1 52.0000000 W  
 SFO1 100.6228293 MHz  
 CPDPRG2

MUC2 1H  
 PLM2 12.0000000 W  
 PLM12 0.35563001 W  
 PLM13 0.28830001 W  
 SFO2 400.1316005 MHz

F2 - Processing parameters  
 SI 32768  
 SF 100.6127690 MHz  
 WDM EM  
 SSB 0  
 LB 1.00 Hz  
 GB 0  
 PC 1.40

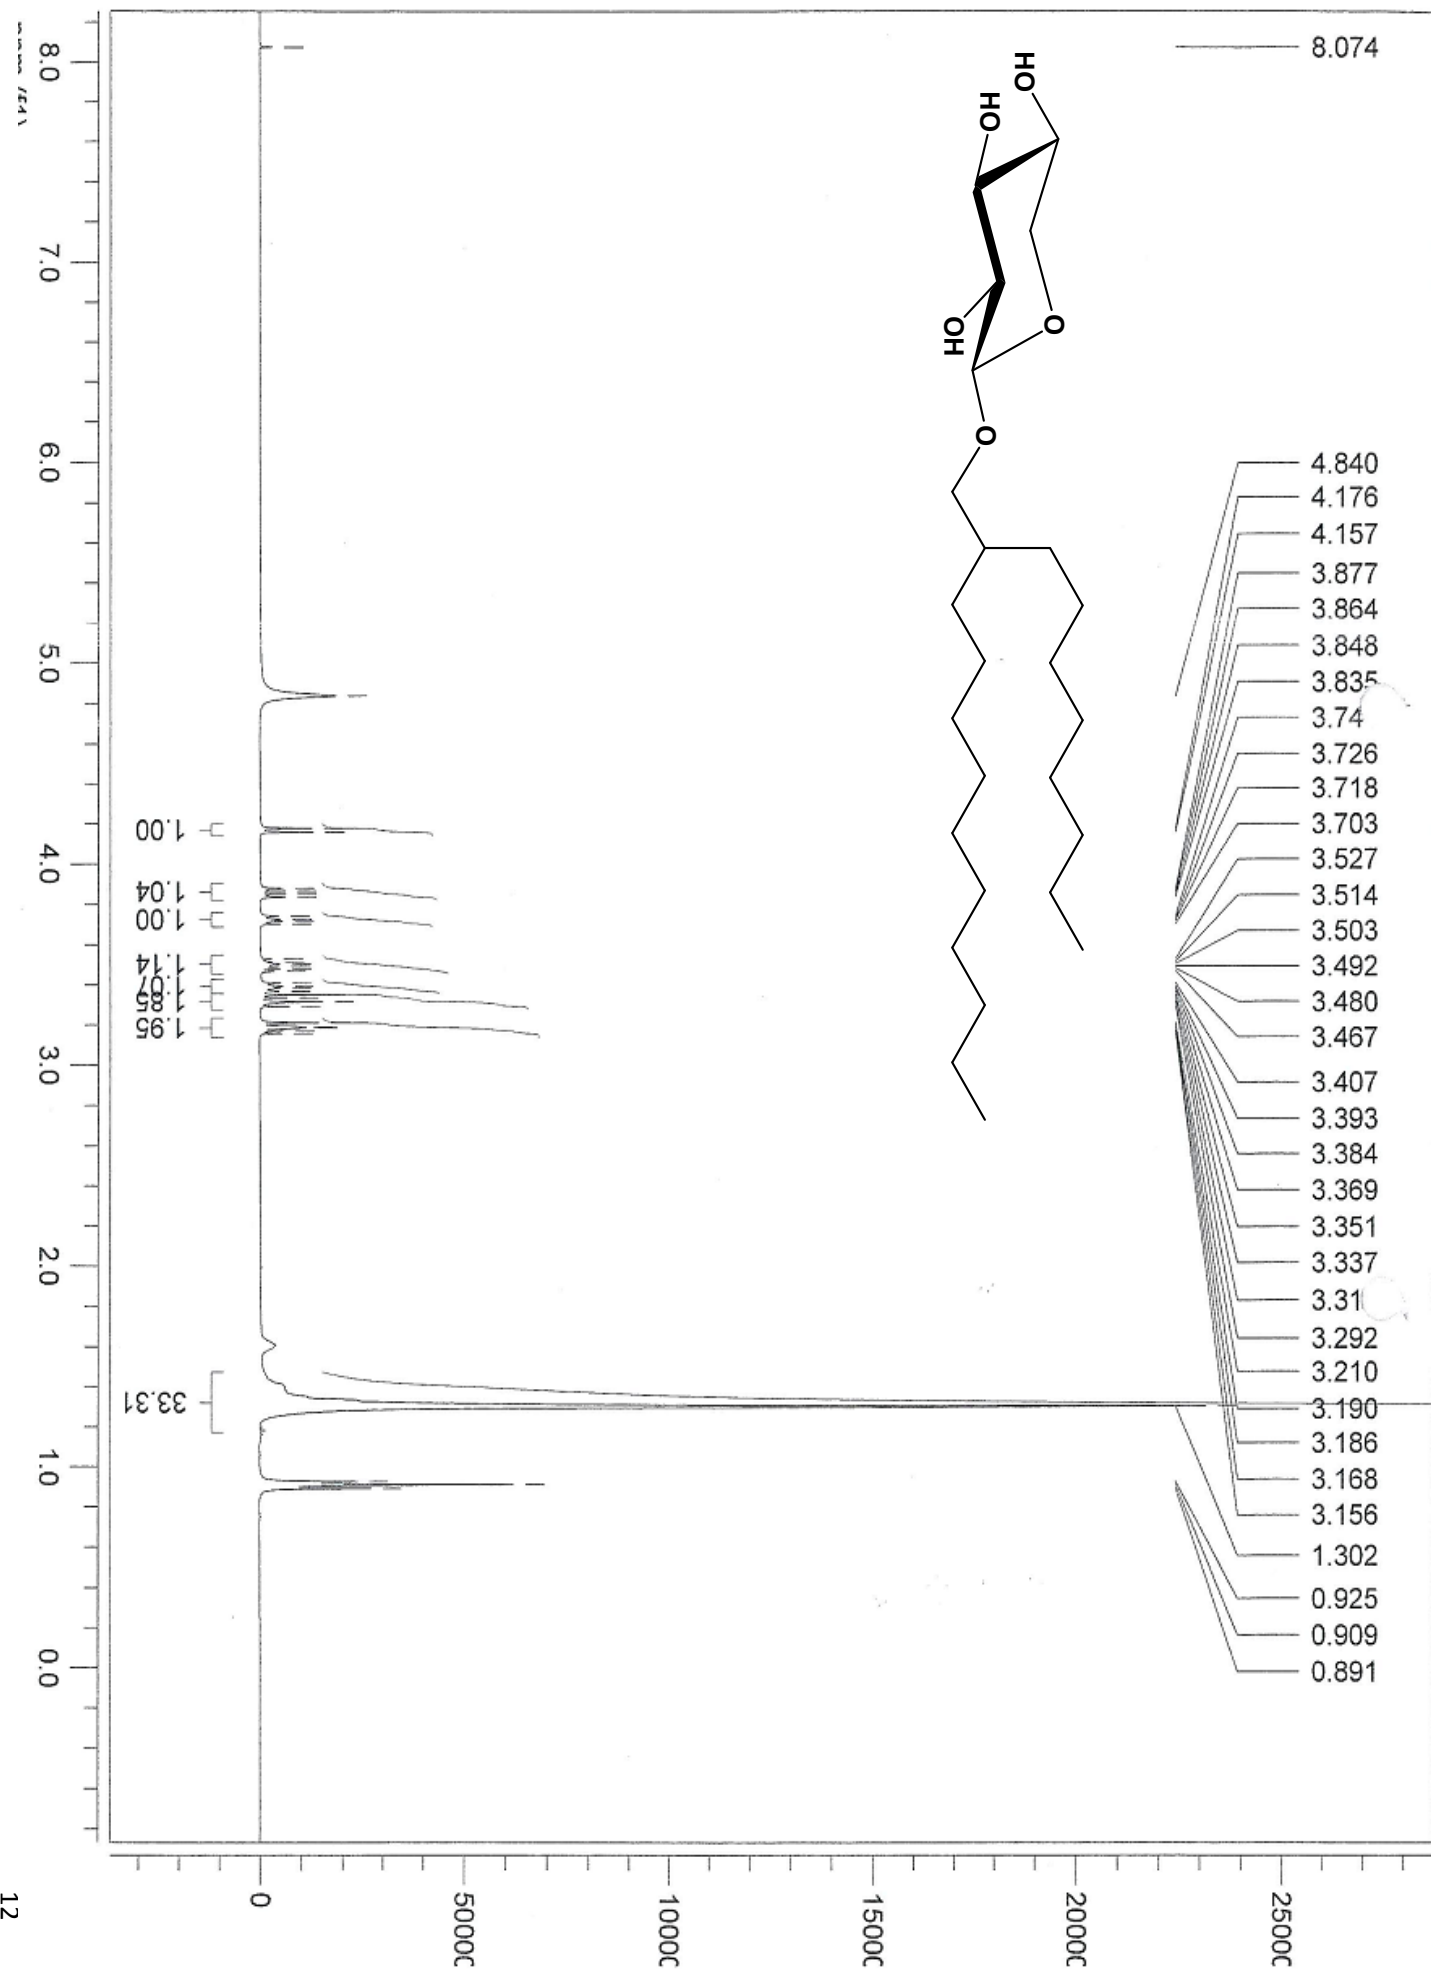

<sup>13</sup>C-xyloside C12C8 Free

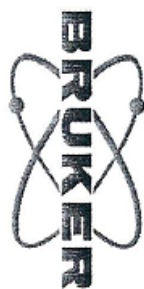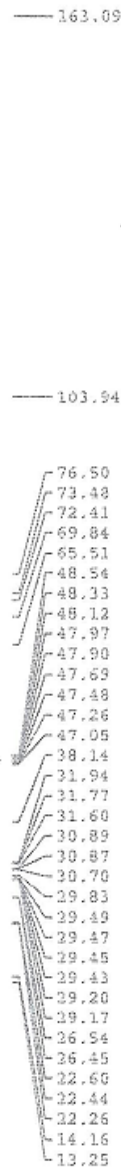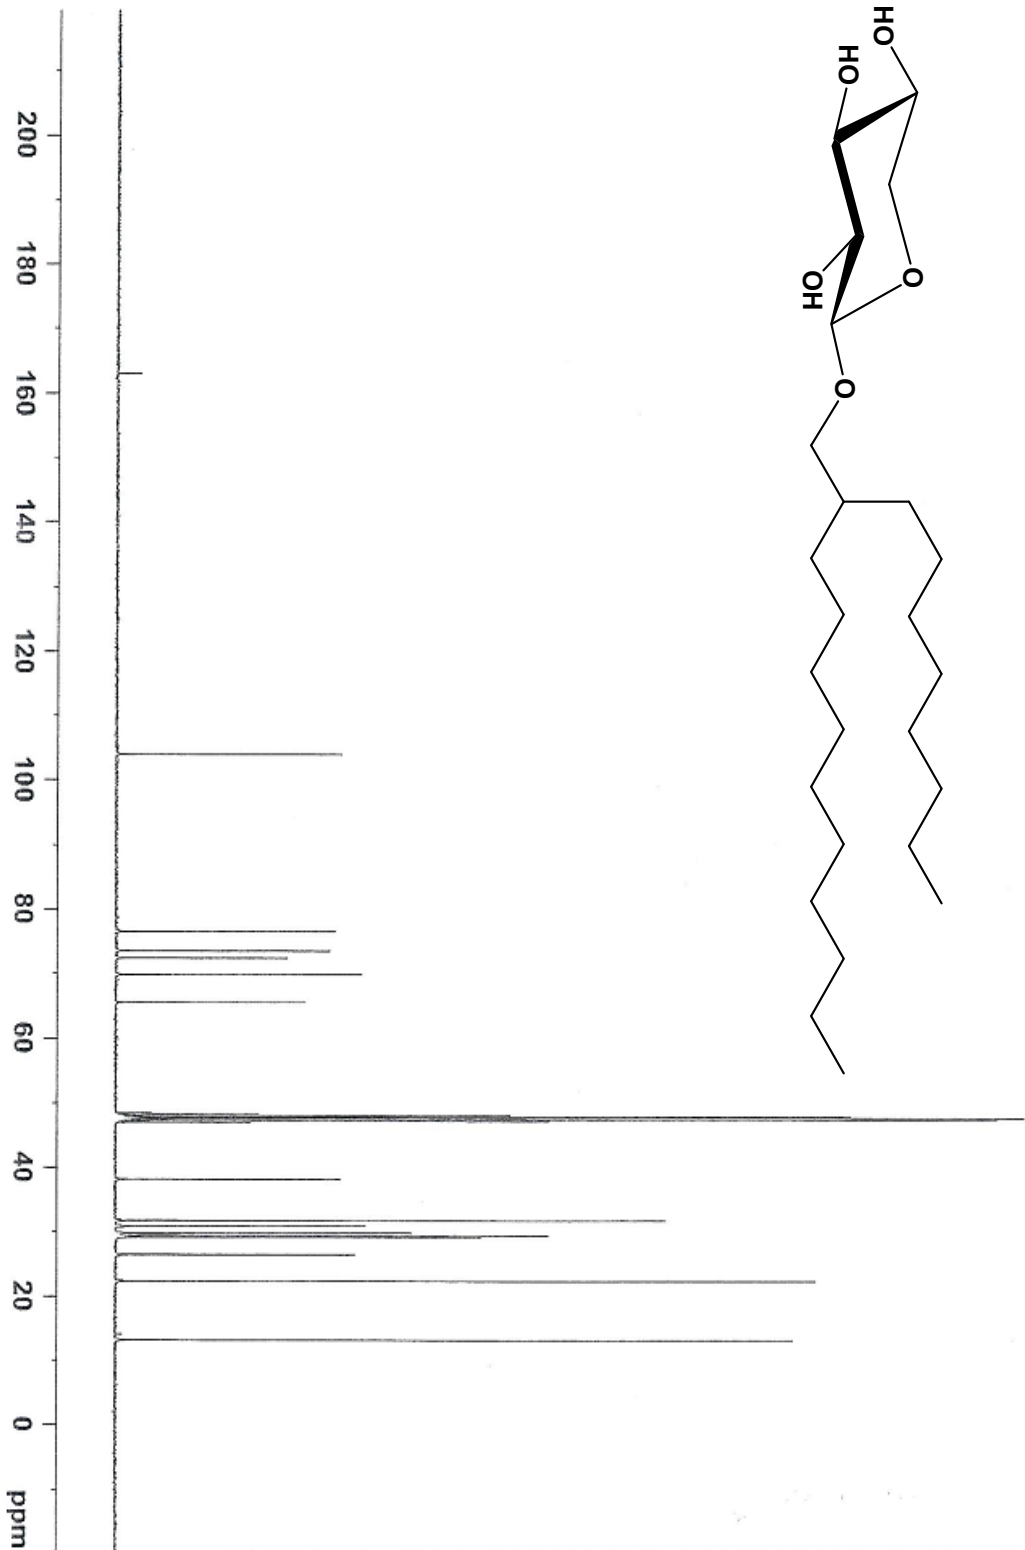

Current Data Parameters  
 NAME Mar27-2014 xylose #4  
 EXPNO 11  
 PROCNO 1

F2 - Acquisition Parameters

Date\_ 20140327  
 Time\_ 16.06  
 INSTRUM spect  
 PROBD 5 mm PABBO BB/  
 PULPROG zgpg30  
 TD 65536  
 SOLVENT MeOD  
 NS 600  
 DS 4  
 SWH 24038.461 Hz  
 FIDRES 0.36798 Hz  
 AQ 1.3631988 sec  
 RG 200.65  
 DW 20.800 usec  
 DE 6.50 usec  
 TE 298.1 K  
 D1 2.00000000 sec  
 d11 0.03000000 sec  
 DELTA 1.89999998 sec

TD0 1  
 NUC1 <sup>13</sup>C  
 P1 10.00 usec  
 PLM1 52.00000000 W  
 SFO1 100.6228293 MHz

CPDPRG2  
 NUC2 <sup>1</sup>H  
 PLM2 12.00000000 W  
 PLM12 0.35563001 W  
 PLM13 0.28830001 W  
 SFO2 400.1316005 MHz

F2 - Processing Parameters  
 SI 32768  
 SF 100.6127690 MHz  
 WDW EM  
 SSB 0  
 LB 1.00 Hz  
 GB 0  
 PC 1.40

1H-xyloside-C10C14 Free

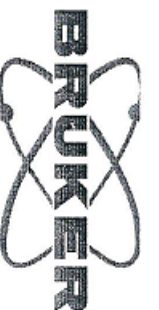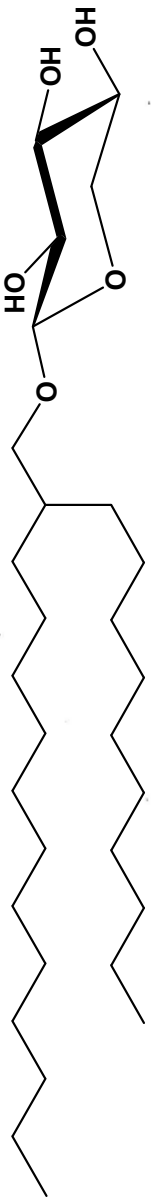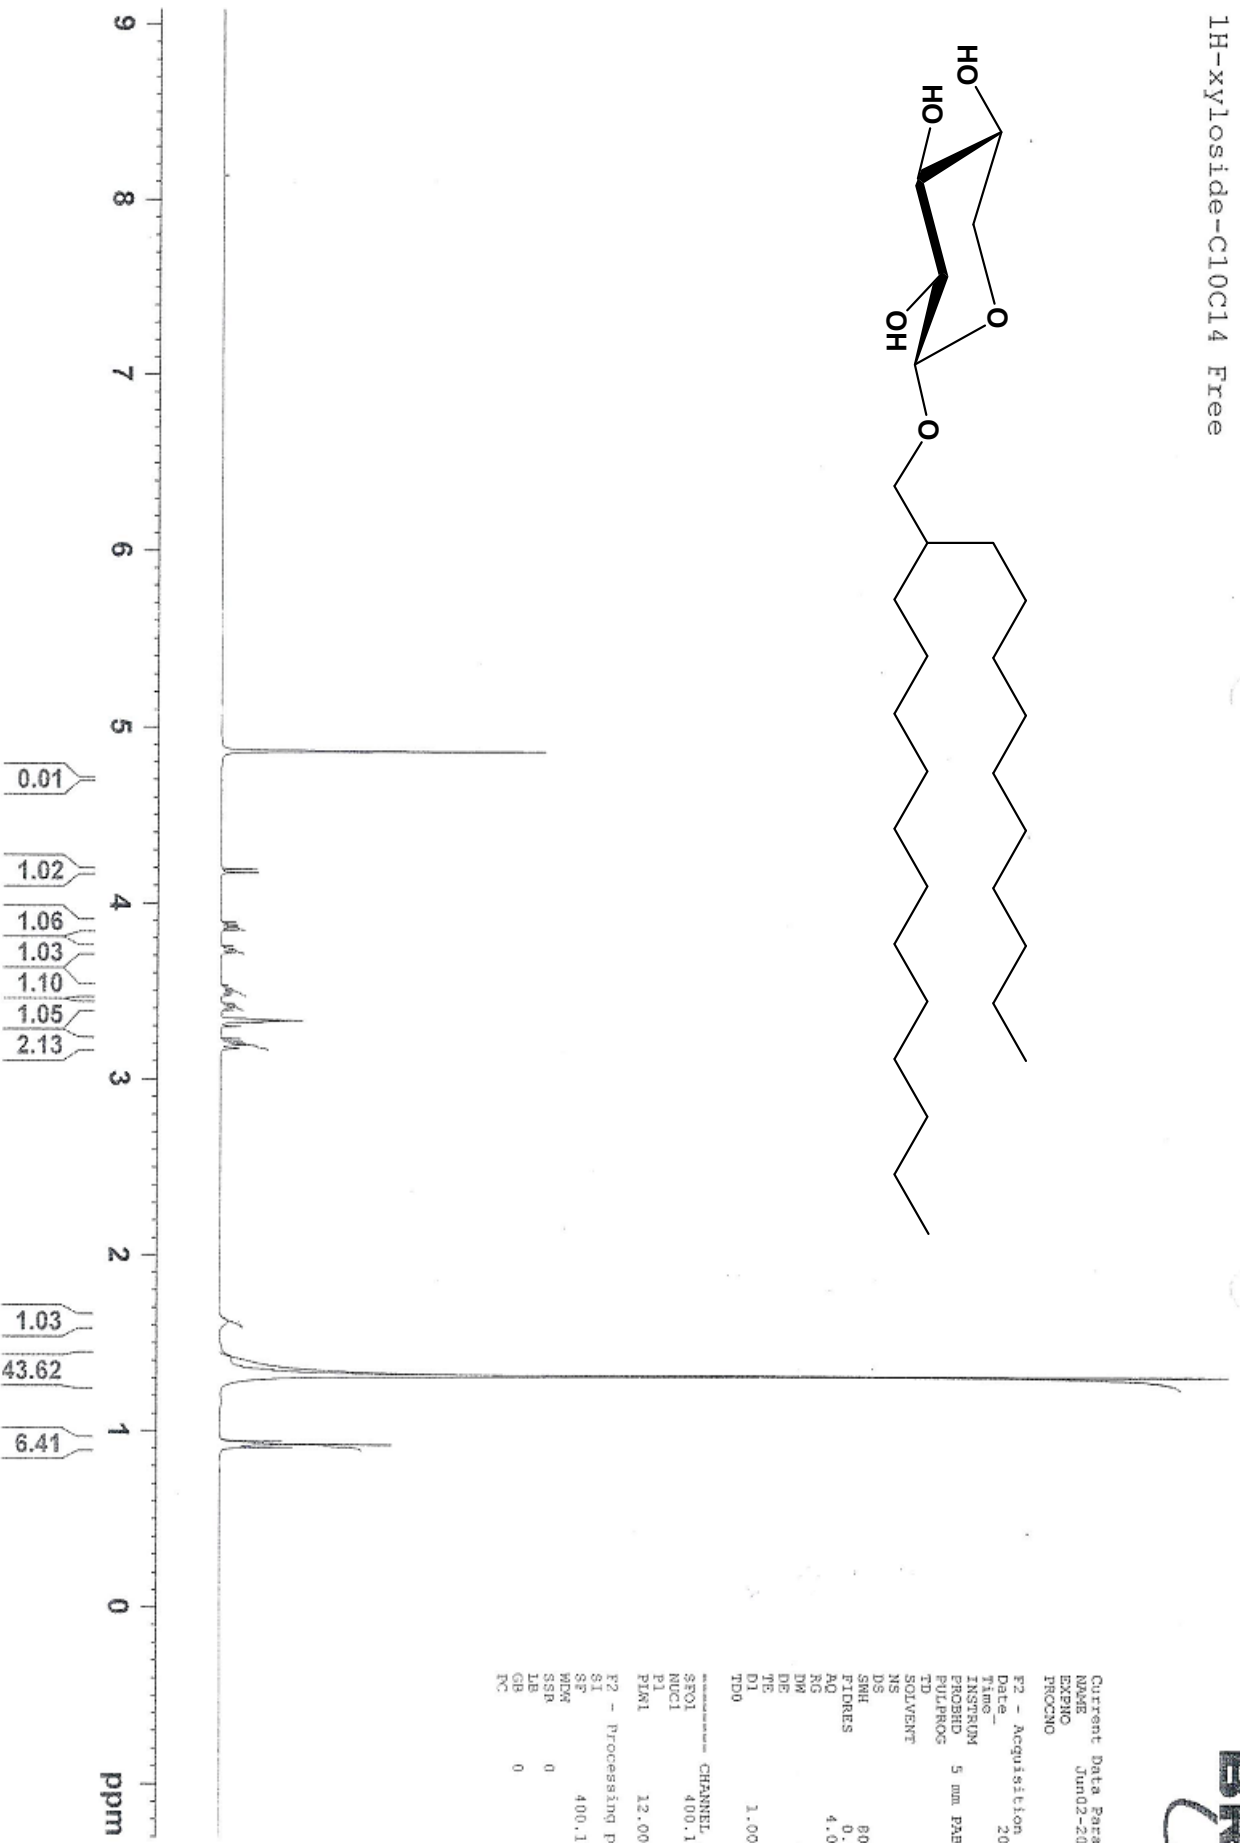

Current Data Parameters  
 NAME Jun02-2014 xyloside #5-3 Free  
 EXPNO 10  
 PROCNO 1

F2 - Acquisition Parameters  
 Date\_ 20140602  
 Time 13.22  
 INSTRUM spect  
 PROBRD 5 mm PARAO BB/  
 PULPROG zg30  
 TD 65536  
 SOLVENT MeOD  
 NS 64  
 DS 2  
 SWH 8012.820 Hz  
 FIDRES 0.122286 Hz  
 AQ 4.0894986 sec  
 RG 80.05  
 DW 62.400 usec  
 DE 6.50 usec  
 TE 298.2 K  
 D1 1.00000000 sec  
 TD0 1

CHANNEL F1  
 SFO1 400.1324710 MHz  
 NUCL1 1H  
 P1 15.50 usec  
 FLM1 12.00000000 W

F2 - Processing parameters  
 SI 32768  
 SF 400.1300000 MHz  
 HF 84  
 ZF 0  
 SFR 0.30 Hz  
 ZF 0  
 SFR 1.00

13C-xyloside-Cl0C14 Free

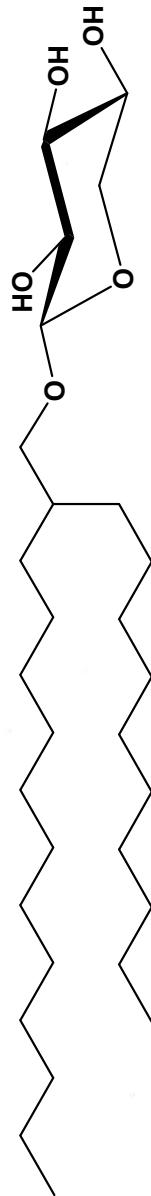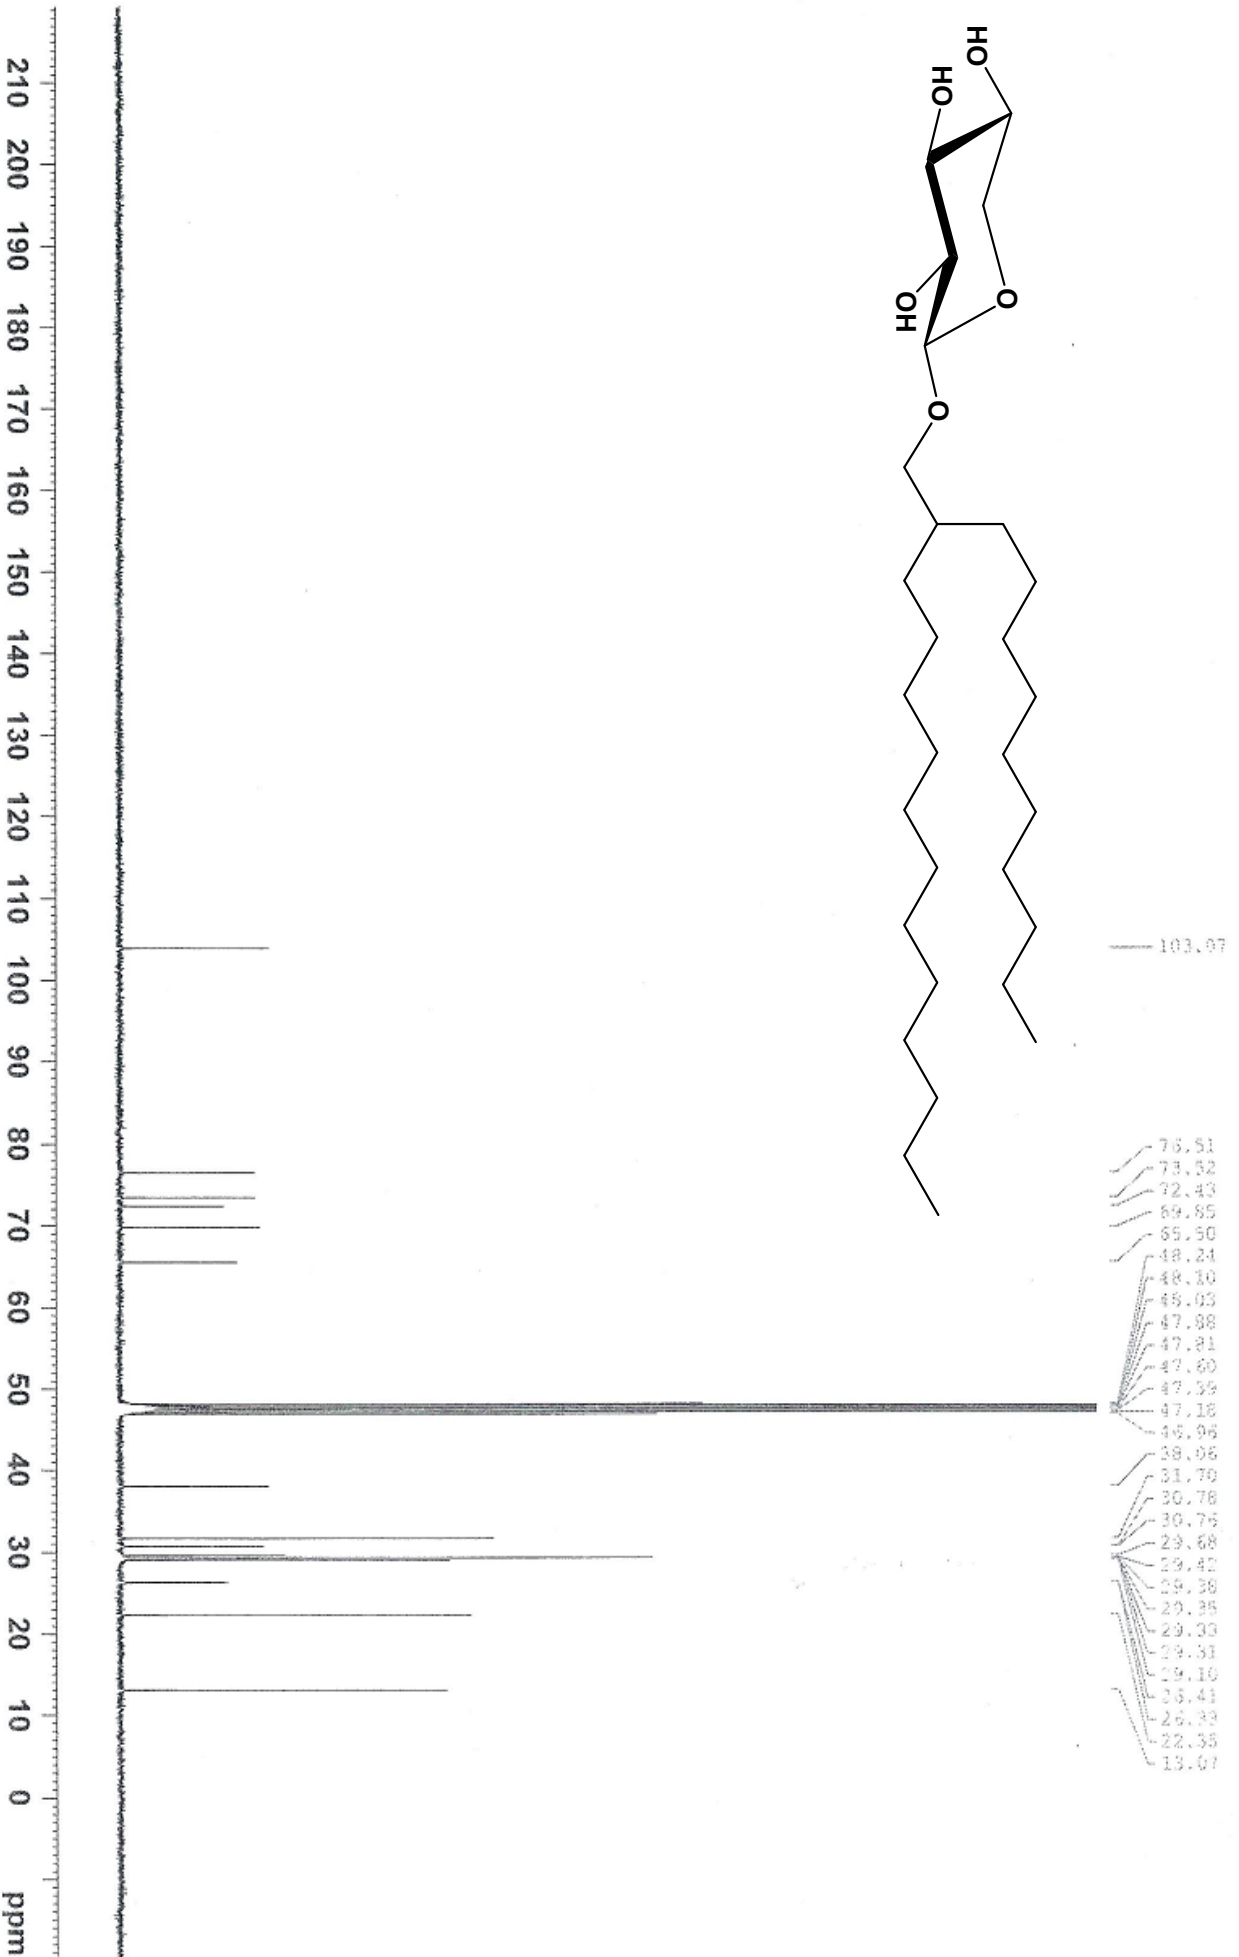

Supplement: c5ra17828b1.pdf [file c5ra17828b1.pdf]
